# Supplementary material
Source: PubMed Central journal article supplement (PMC6439564)
Supplement: jamaoncol-5-195-s003.pdf [file jamaoncol-5-195-s003.pdf]

## Data Sharing Statement

Siu. Safety and Efficacy of Durvalumab With or Without Tremelimumab in Patients With PD-L1–Low/Negative Recurrent or Metastatic HNSCC. *JAMA Oncol.* Published November 01, 2018. 10.1001/jamaoncol.2018.4628

### Data

**Data available:** Yes

**Data types:** Deidentified participant data

**How to access data:** Data underlying findings described in this manuscript may be obtained in accordance with AstraZeneca's data sharing policy described at <https://astrazenecagrouptrials.pharmacm.com/ST/Submission/Disclosure>.

**When available:** With publication

### Supporting Documents

**Document types:** None

### Additional Information

**Who can access the data:** Data underlying findings described in this manuscript may be obtained in accordance with AstraZeneca's data sharing policy described at <https://astrazenecagrouptrials.pharmacm.com/ST/Submission/Disclosure>.

**Types of analyses:** Data underlying findings described in this manuscript may be obtained in accordance with AstraZeneca's data sharing policy described at <https://astrazenecagrouptrials.pharmacm.com/ST/Submission/Disclosure>.

**Mechanisms of data availability:** Data underlying findings described in this manuscript may be obtained in accordance with AstraZeneca's data sharing policy described at <https://astrazenecagrouptrials.pharmacm.com/ST/Submission/Disclosure>.

**Any additional restrictions:** Data underlying findings described in this manuscript may be obtained in accordance with AstraZeneca's data sharing policy described at <https://astrazenecagrouptrials.pharmacm.com/ST/Submission/Disclosure>.
